# Supplementary material for: Effect of the 35 nm and 70 nm Size Exclusion Chromatography (SEC) Column and Plasma Storage Time on Separated Extracellular Vesicles
Source: MDPI journal article supplement (doi:10.3390/cimb46050264), 2024-05-06
Supplement: s1 [file s1]

| category              | description           | term name  | # genes | genes                                                                                                                                                                                                                                                                                                                                                                                                                                                                                                                                                                                                                                                                                                                                                                                                                                                                                                                                                                                                                                                                                                                                                                                                                                                                                                                                                                                                                                                                                                                                                                                  | # background genes | FDR value | p-value  | transferred FDR value | network.SUID |
|-----------------------|-----------------------|------------|---------|----------------------------------------------------------------------------------------------------------------------------------------------------------------------------------------------------------------------------------------------------------------------------------------------------------------------------------------------------------------------------------------------------------------------------------------------------------------------------------------------------------------------------------------------------------------------------------------------------------------------------------------------------------------------------------------------------------------------------------------------------------------------------------------------------------------------------------------------------------------------------------------------------------------------------------------------------------------------------------------------------------------------------------------------------------------------------------------------------------------------------------------------------------------------------------------------------------------------------------------------------------------------------------------------------------------------------------------------------------------------------------------------------------------------------------------------------------------------------------------------------------------------------------------------------------------------------------------|--------------------|-----------|----------|-----------------------|--------------|
| GO Cellular Component | Extracellular exosome | GO:0070062 | 186     | PSMA4 SLC2A3  <i>APOH</i>  TGM1 SERPIND1 PSMA3 PROCR CORO1A RETN  <i>PON1</i>  PSMA2 C5  PFN1 VTN<br> CTSC   <i>APOC3</i>  ARHGDIB TPI1 LTF HRG  <i>APOB</i>   <i>APOA1</i>  CAT VASP  GGT1  <i>SNAP23</i>  KRT6B  <i>APOE</i>  BPIFB1<br> CAPN7 LGALS3 IL1RN GGH  <i>PZP</i>   <i>VWF</i>  PSMA6 BLMH  <i>CDH1</i>  ATP5F1B PSMB1 SLC4A1 A1BG PACSIN2<br> C6  CP  ICAM1  <i>HPX</i>  IDE ITIH4  <i>SERPINB13</i>  S100A11 ITIH1 AHSG  <i>SERPING1</i>  RHOC ATP1B3  <i>PSMB4</i>   <i>PIP</i><br> CSTB AZGP1  <i>NCSTN</i>  COL6A3 S100P CAMP FABP5 TPP1 COL6A2 GUSB GNB2  <i>FGB</i>  PLG  AQP1 CST6<br> TOLLIP CALML3 TLN1 STX4 PKM SERPINF2  <i>TUFM</i>  PLEC HSPA5 MDH2 DEFA3  <i>SERPINA5</i>  BSG  FGG  PPL<br> NCCRP1  <i>APOD</i>  CTSB ALDH9A1  <i>FN1</i>   <i>APOA4</i>  SYNE2 ITIH2 VCP HLA-DRB1 C8A  PNP  <i>TGM2</i>  AGT<br> H3-3A  <i>SERPINC1</i>   <i>APOA2</i>  F11R  <i>TAGLN2</i>  S100A14  <i>S100A16</i>  S100A8 S100A9  <i>DMBT1</i>  PSMA7  <i>GNG12</i>  CTSA<br> CAP1  <i>YWHAB</i>  PSMB2 EIF6 TXN SLC44A1 HLA-C SLC3A2 PODXL LGALS7 DSP SERPINB1  <i>C1QTNF3</i><br> ZG16B FSCN1 NME2  <i>CNP</i>  JUP PROS1  <i>PSAP</i>  HLA-DRA YWHAZ HLA-A ITGA4 ITGB2 LCP1 MASP2 NUCB1<br> PCYOX1 ARPC4 IDH1 TKT ORM2  <i>C4A</i>  HLA-B PTPRJ GNA13 DCD PTPRC  <i>LRRC15</i>  PSMA1  <i>C4B</i>   <i>SERPINA1</i><br> SLC2A1  <i>SELENOP</i>  WDR1 LYN  <i>IGLL5</i>  CAPN1 CFL1  <i>FCGR3B</i>  MUC5B  <i>JCHAIN</i>  HPR  MYL6  <i>IGKV2D-28</i><br> ITGB3 PECAM1 TTN KPRP H4C1 CIB1 SMR3B  <i>IGKV1D-33</i>  PSMB3  <i>HBB</i>  GSS  <i>RDX</i>  ITGAM B2M SPN | 2096               | 9,45E-102 | 7,55E-08 | 0,56161846            | 218          |
