# Supplementary material for: Effect of the 35 nm and 70 nm Size Exclusion Chromatography (SEC) Column and Plasma Storage Time on Separated Extracellular Vesicles
Source: MDPI journal article supplement (doi:10.3390/cimb46050264), 2024-05-06
Supplement: s1 [file s1]

| "vesicular" proteins |                                                                      |                       |                     |                 |                                |                |                                          |                |                                           |                |          |          |
|----------------------|----------------------------------------------------------------------|-----------------------|---------------------|-----------------|--------------------------------|----------------|------------------------------------------|----------------|-------------------------------------------|----------------|----------|----------|
| Abbreviation         | Protein Name                                                         | Extracellular exosome | Endomembrane system | Plasma membrane | Bounding membrane of organelle | 35 nm          |                                          | 70 nm          |                                           | measurement    |          |          |
|                      |                                                                      |                       |                     |                 |                                | n=11           |                                          | n=17           |                                           | (A) + (B)<br>% | (A)<br>% | (B)<br>% |
|                      |                                                                      |                       |                     |                 |                                | %<br>(A) + (B) | data point (A)<br>/data point (B)<br>6/5 | %<br>(A) + (B) | data point (A)<br>/data point (B)<br>13/4 | 35 nm = 70 nm  |          |          |
|                      |                                                                      |                       |                     |                 |                                |                |                                          |                |                                           | 35 nm < 70 nm  |          |          |
|                      |                                                                      |                       |                     |                 |                                |                |                                          |                |                                           | 35 nm > 70 nm  |          |          |
|                      |                                                                      | GO: 0070262           | GO: 0012359         | GO: 0005884     | GO: 0098582                    |                |                                          |                |                                           |                |          |          |
| A2MG                 | Alpha-2-macroglobulin                                                | x                     | x                   |                 |                                | 100            | 6/5                                      | 100            | 13/4                                      |                |          |          |
| ANXA1                | Annexin A1                                                           | x                     | x                   | x               | x                              | 100            | 6/5                                      | 100            | 13/4                                      |                |          |          |
| ANXA2                | Annexin A2                                                           | x                     | x                   | x               | x                              | 100            | 6/5                                      | 100            | 13/4                                      |                |          |          |
| CD5L                 | CD5 antigen-like                                                     |                       |                     | x               |                                | 100            | 6/5                                      | 100            | 13/4                                      |                |          |          |
| G3P                  | Glyceraldehyde-3-phosphate dehydrogenase                             | x                     | x                   | x               |                                | 100            | 6/5                                      | 100            | 13/4                                      |                |          |          |
| LG3BP                | Galectin-3-binding protein                                           | x                     | x                   |                 |                                | 100            | 6/5                                      | 100            | 13/4                                      |                |          |          |
| CD34                 | Hematopoietic progenitor cell antigen CD34                           |                       |                     | x               |                                | 18             | 1/1                                      | 41             | 6/1                                       |                |          |          |
| EZRI                 | Ezrin                                                                | x                     | x                   | x               |                                | 36             | 1/3                                      | 41             | 3/4                                       |                |          |          |
| LAMP1                | lysosome-associated membrane glycoprotein 1                          | x                     | x                   | x               | x                              | 18             | 0/2                                      | 24             | 1/3                                       |                |          |          |
| MFGM                 | Lactadherin                                                          | x                     | x                   | x               | x                              | 45             | 2/3                                      | 88             | 11/4                                      |                |          |          |
| RAC2                 | Ras-related C3 botulinum toxin substrate 2                           | x                     | x                   | x               | x                              | 64             | 3/4                                      | 65             | 7/4                                       |                |          |          |
| A2ML1                | Alpha-2-macroglobulin-like protein 1                                 | x                     |                     |                 |                                | 55             | 1/5                                      | 59             | 6/4                                       |                |          |          |
| CD36                 | Platelet glycoprotein 4                                              |                       | x                   | x               | x                              | 91             | 5/5                                      | 94             | 12/4                                      |                |          |          |
| EF1A3                | Putative elongation factor 1-alpha-like 3                            |                       | x                   | x               |                                | 82             | 4/5                                      | 82             | 10/4                                      |                |          |          |
| ENOA                 | Alpha-enolase                                                        | x                     | x                   | x               | x                              | 82             | 4/5                                      | 100            | 13/4                                      |                |          |          |
| GNAI2                | Guanine nucleotide-binding protein G(i) subunit alpha-2              | x                     |                     | x               |                                | 91             | 5/5                                      | 94             | 12/4                                      |                |          |          |
| PRDX1                | Peroxisredoxin-1                                                     | x                     |                     |                 |                                | 82             | 4/5                                      | 94             | 12/4                                      |                |          |          |
| ACTBL                | Beta-actin-like protein 2                                            | x                     |                     |                 |                                | 45             | 5/0                                      | 65             | 11/0                                      |                |          |          |
| LAMB4                | Laminin subunit beta-4                                               |                       |                     |                 |                                | 9              | 1/0                                      | 24             | 4/0                                       |                |          |          |
| CD44                 | CD44 antigen                                                         | x                     | x                   | x               | x                              | 27             | 0/3                                      | 35             | 4/2                                       |                |          |          |
| CD81                 | CD81 antigen                                                         | x                     |                     | x               |                                | 73             | 4/4                                      | 76             | 10/3                                      |                |          |          |
| CFAH                 | Complement factor H                                                  | x                     |                     |                 |                                | 73             | 6/2                                      | 100            | 13/4                                      |                |          |          |
| ANXA4                | Annexin A4                                                           | x                     | x                   | x               |                                | 9              | 0/1                                      | 12             | 0/2                                       |                |          |          |
| CDC42                | Cell division control protein 42 homolog                             | x                     | x                   | x               | x                              | 18             | 0/2                                      | 24             | 0/4                                       |                |          |          |
| CLIC1                | Chloride intracellular channel protein 1                             | x                     | x                   | x               |                                | 9              | 0/1                                      | 18             | 0/3                                       |                |          |          |
| FLOT1                | Flotillin-1                                                          | x                     | x                   | x               | x                              | 9              | 0/1                                      | 12             | 0/2                                       |                |          |          |
| GNAS2                | Guanine nucleotide-binding protein G(s) subunit alpha isoforms short | x                     | x                   | x               |                                | 9              | 0/1                                      | 18             | 0/3                                       |                |          |          |
| HS90A                | Heat shock protein HSP 90-alpha                                      | x                     | x                   | x               |                                | 9              | 0/1                                      | 18             | 0/3                                       |                |          |          |
| RAC1                 | Ras-related C3 botulinum toxin substrate 1                           | x                     | x                   | x               | x                              | 9              | 0/1                                      | 18             | 0/3                                       |                |          |          |
| RAP2B                | Ras-related protein Rap-2b                                           | x                     | x                   | x               | x                              | 9              | 0/1                                      | 12             | 0/2                                       |                |          |          |
| RAP1B                | Ras-related protein Rap-1b                                           | x                     | x                   | x               | x                              | 82             | 5/4                                      | 82             | 10/4                                      |                |          |          |
| HSP72                | Heat shock-related 70 kDa protein 2                                  | x                     | x                   | x               | x                              | 55             | 6/0                                      | 59             | 10/0                                      |                |          |          |
| RAP1A                | Ras-related protein Rap-1A                                           | x                     | x                   | x               | x                              | 45             | 5/0                                      | 47             | 8/0                                       |                |          |          |
| TBA1B                | Tubulin alpha-1B chain                                               |                       |                     |                 |                                | 36             | 0/4                                      | 35             | 2/4                                       |                |          |          |
| EF2                  | Elongation factor 2                                                  | x                     | x                   | x               |                                | 45             | 0/5                                      | 29             | 1/4                                       |                |          |          |
| AACT                 | Alpha-1-antichymotrypsin                                             | x                     | x                   |                 |                                | 91             | 5/5                                      | 88             | 11/4                                      |                |          |          |
| HSPB1                | Heat shock protein beta-1                                            | x                     |                     | x               |                                | 64             | 2/5                                      | 53             | 5/4                                       |                |          |          |
| PPIA                 | Peptidyl-prolyl cis-trans isomerase A                                | x                     | x                   |                 |                                | 45             | 0/5                                      | 35             | 2/4                                       |                |          |          |
| SDCB1                | Syntenin-1                                                           | x                     | x                   | x               |                                | 82             | 4/5                                      | 76             | 9/4                                       |                |          |          |
| ACTG                 | Actin, cytoplasmic 2                                                 | x                     |                     | x               |                                | 45             | 0/5                                      | 24             | 0/4                                       |                |          |          |
| MYH9                 | Myosin-9                                                             | x                     | x                   | x               |                                | 45             | 0/5                                      | 24             | 0/4                                       |                |          |          |
| PGK1                 | Phosphoglycerate kinase 1                                            | x                     |                     |                 |                                | 45             | 0/5                                      | 24             | 0/4                                       |                |          |          |
| RAB10                | Ras-related protein Rab-10                                           | x                     | x                   | x               | x                              | 45             | 0/5                                      | 24             | 0/4                                       |                |          |          |
| RAB7A                | Ras-related protein Rab-7a                                           | x                     | x                   | x               | x                              | 45             | 0/5                                      | 24             | 0/4                                       |                |          |          |
| ANXA5                | Annexin A5                                                           | x                     |                     | x               |                                | 36             | 0/4                                      | 24             | 0/4                                       |                |          |          |
| ANXA6                | Annexin A6                                                           | x                     | x                   |                 | x                              | 27             | 0/3                                      | 18             | 0/3                                       |                |          |          |
| ARF1                 | ADP-ribosylation factor 1                                            | x                     | x                   | x               | x                              | 9              | 0/1                                      | 6              | 0/1                                       |                |          |          |
| AT1A1                | Sodium/potassium-transporting ATPase subunit alpha-1                 | x                     | x                   | x               |                                | 36             | 0/4                                      | 24             | 0/4                                       |                |          |          |
| CD37                 | Leukocyte antigen CD37                                               | x                     |                     | x               |                                | 27             | 0/3                                      | 24             | 0/4                                       |                |          |          |
| FLNA                 | Filamin-A                                                            | x                     | x                   | x               |                                | 36             | 0/4                                      | 24             | 0/4                                       |                |          |          |
| FLOT2                | Flotillin-2                                                          | x                     | x                   | x               | x                              | 27             | 0/3                                      | 18             | 0/3                                       |                |          |          |
| ITA6                 | Integrin alpha-6                                                     |                       |                     | x               |                                | 27             | 0/3                                      | 24             | 0/4                                       |                |          |          |
| LDHA                 | L-lactate dehydrogenase A chain                                      | x                     |                     |                 |                                | 27             | 0/3                                      | 18             | 0/3                                       |                |          |          |
| RAB14                | Ras-related protein Rab-14                                           | x                     | x                   | x               | x                              | 9              | 0/1                                      | 6              | 0/1                                       |                |          |          |
| RAB1B                | Ras-related protein Rab-1B                                           | x                     | x                   |                 | x                              | 9              | 0/1                                      | 6              | 0/1                                       |                |          |          |
| RAB8A                | Ras-related protein Rab-8A                                           | x                     | x                   | x               | x                              | 18             | 0/2                                      | 18             | 0/3                                       |                |          |          |
| RAB8B                | Ras-related protein Rab-8B                                           | x                     | x                   | x               | x                              | 18             | 0/2                                      | 12             | 0/2                                       |                |          |          |
| PRDX6                | Peroxisredoxin-6                                                     | x                     | x                   |                 |                                | 18             | 0/2                                      | 18             | 0/3                                       |                |          |          |
| CD9                  | CD9 antigen                                                          | x                     | x                   | x               | x                              | 82             | 5/4                                      | 59             | 6/4                                       |                |          |          |
| FLNB                 | Filamin-B                                                            | x                     |                     | x               |                                | 36             | 1/3                                      | 24             | 1/3                                       |                |          |          |
| PDC6I                | Programmed cell death 6-interacting protein                          | x                     | x                   | x               |                                | 55             | 2/4                                      | 41             | 3/4                                       |                |          |          |
| TBB2A                | Tubulin beta-2A chain                                                | x                     |                     |                 |                                | 36             | 3/1                                      | 35             | 4/2                                       |                |          |          |
| CD59                 | CD59 glycoprotein                                                    | x                     | x                   | x               | x                              | 100            | 6/5                                      | 76             | 9/4                                       |                |          |          |
| HSP7C                | Heat shock cognate 71 kDa protein                                    | x                     | x                   | x               | x                              | 100            | 6/5                                      | 88             | 11/4                                      |                |          |          |
| PRDX2                | Peroxisredoxin-2                                                     | x                     |                     |                 |                                | 100            | 6/5                                      | 94             | 12/4                                      |                |          |          |
| STOM                 | Stomatin                                                             | x                     | x                   | x               | x                              | 100            | 6/5                                      | 94             | 12/4                                      |                |          |          |
| TFR1                 | Transferrin Receptor protein 1                                       | x                     | x                   | x               | x                              | 100            | 6/5                                      | 94             | 12/4                                      |                |          |          |
| CDC5L                | Cell division cycle 5-like protein                                   |                       |                     |                 |                                | 18             | 2/0                                      | 12             | 2/0                                       |                |          |          |
| TPC12                | Trafficking protein particle complex subunit 12                      |                       | x                   |                 |                                | 9              | 1/0                                      | 6              | 1/0                                       |                |          |          |
| ANX11                | Annexin A11                                                          | x                     | x                   |                 |                                | 18             | 0/2                                      | 6              | 0/1                                       |                |          |          |
| CLH1                 | Clahtrin heavy chain 1                                               | x                     | x                   | x               | x                              | 27             | 0/3                                      | 6              | 0/1                                       |                |          |          |
| PDCD6                | Programmed cell death protein 6                                      | x                     | x                   | x               | x                              | 18             | 0/2                                      | 6              | 0/1                                       |                |          |          |
| RAB5C                | Ras-related protein Rab-5C                                           | x                     | x                   | x               | x                              | 18             | 0/2                                      | 6              | 0/1                                       |                |          |          |
| HS71A                | Heat shock 70 kDa protein 1A                                         | x                     | x                   | x               |                                | 91             | 6/4                                      | 76             | 10/3                                      |                |          |          |
