# Supplementary material for: Effect of the 35 nm and 70 nm Size Exclusion Chromatography (SEC) Column and Plasma Storage Time on Separated Extracellular Vesicles
Source: MDPI journal article supplement (doi:10.3390/cimb46050264), 2024-05-06
Supplement: s1 [file s1]

| Abbreviation | Protein Name                                                      | Cellular Component    |                 |              |                                |                              |                                            |                       |             |             |              |                    |                                     |                          | Biological Process           |                                  |                                          |                                  |                |                                 | 35 nm<br>n=9                    | 70 nm<br>n=9  | measurement   |               |  |
|--------------|-------------------------------------------------------------------|-----------------------|-----------------|--------------|--------------------------------|------------------------------|--------------------------------------------|-----------------------|-------------|-------------|--------------|--------------------|-------------------------------------|--------------------------|------------------------------|----------------------------------|------------------------------------------|----------------------------------|----------------|---------------------------------|---------------------------------|---------------|---------------|---------------|--|
|              |                                                                   | Extracellular exosome | Plasma membrane | Cell surface | Bounding membrane of organelle | Cytoplasmic vesicle membrane | COPII-coated ER to Golgi transport vesicle | Endoplasmic reticulum | Endosome    | Lysosome    | Cytoskeleton | Proteasome complex | Regulation of immune system process | Regulation of cell death | Regulation of cell migration | Regulation of cell-cell adhesion | Regulation of vesicle-mediated transport | Regulation of cell morphogenesis | (A) + (B)<br>% | (A)<br>%                        |                                 |               | (B)<br>%      |               |  |
|              |                                                                   |                       |                 |              |                                |                              |                                            |                       |             |             |              |                    |                                     |                          |                              |                                  |                                          |                                  |                |                                 |                                 |               |               |               |  |
|              |                                                                   |                       |                 |              |                                |                              |                                            |                       |             |             |              |                    |                                     |                          |                              |                                  |                                          |                                  |                |                                 |                                 |               |               |               |  |
|              |                                                                   | GO: 0070062           | GO: 0009986     | GO: 0009986  | GO: 0009988                    | GO: 0009989                  | GO: 0009989                                | GO: 0009989           | GO: 0009989 | GO: 0009989 | GO: 0009989  | GO: 0009989        | GO: 0009989                         | GO: 0009989              | GO: 0009989                  | GO: 0009989                      | GO: 0009989                              | GO: 0009989                      | GO: 0009989    | data point (A) / data point (B) | data point (A) / data point (B) | 35 nm = 70 nm | 35 nm < 70 nm | 35 nm > 70 nm |  |
| DRB          | HLA class II histocompatibility antigen, DRB1 beta chain          | X                     | X               | X            | X                              | X                            | X                                          | X                     | X           | X           | X            |                    | X                                   |                          |                              | X                                |                                          |                                  | 0/2            | 0/3                             |                                 |               |               |               |  |
| DRA          | HLA class II histocompatibility antigen, DR alpha chain           | X                     | X               | X            | X                              | X                            | X                                          | X                     | X           | X           |              |                    | X                                   |                          |                              | X                                |                                          |                                  | 0/2            | 0/3                             |                                 |               |               |               |  |
| HLAA         | HLA class I histocompatibility antigen, A alpha chain             | X                     | X               | X            | X                              | X                            | X                                          | X                     | X           |             |              |                    | X                                   |                          |                              | X                                |                                          |                                  | 0/4            | 0/4                             |                                 |               |               |               |  |
| HLAB         | HLA class I histocompatibility antigen, B alpha chain             | X                     | X               | X            | X                              | X                            | X                                          | X                     | X           |             |              |                    | X                                   |                          |                              |                                  |                                          |                                  | 0/4            | 0/4                             |                                 |               |               |               |  |
| HLAC         | HLA class I histocompatibility antigen, C alpha chain             | X                     | X               | X            | X                              | X                            | X                                          | X                     | X           |             |              |                    |                                     |                          |                              |                                  |                                          |                                  | 0/2            | 0/2                             |                                 |               |               |               |  |
| B2MG         | Beta-2-microglobulin                                              | X                     | X               | X            | X                              | X                            | X                                          | X                     | X           |             |              |                    | X                                   |                          |                              | X                                | X                                        |                                  | 0/1            | 2/3                             |                                 |               |               |               |  |
| STX4         | Syntaxin-4                                                        | X                     | X               | X            | X                              | X                            |                                            |                       | X           |             |              |                    | X                                   | X                        | X                            |                                  | X                                        |                                  | 0/1            | 0/2                             |                                 |               |               |               |  |
| ITB3         | Integrin beta-3                                                   | X                     | X               | X            | X                              | X                            |                                            |                       |             |             |              |                    | X                                   | X                        | X                            |                                  | X                                        | X                                | 3/3            | 4/4                             |                                 |               |               |               |  |
| PTPRJ        | Receptor-type tyrosine-protein phosphatase eta                    | X                     | X               | X            | X                              | X                            |                                            |                       |             |             |              |                    | X                                   |                          | X                            |                                  | X                                        |                                  | 0/2            | 0/3                             |                                 |               |               |               |  |
| ITAM         | Integrin alpha-M                                                  | X                     | X               | X            | X                              | X                            |                                            |                       |             |             |              |                    | X                                   | X                        |                              |                                  | X                                        |                                  | 0/2            | 0/1                             |                                 |               |               |               |  |
| ITB2         | Integrin beta-2                                                   | X                     | X               | X            | X                              | X                            |                                            |                       |             |             |              |                    | X                                   | X                        |                              | X                                | X                                        | X                                | 0/3            | 0/3                             |                                 |               |               |               |  |
| LEG3         | Galectin-3                                                        | X                     | X               | X            | X                              | X                            |                                            |                       |             |             |              |                    | X                                   | X                        | X                            | X                                | X                                        |                                  | 1/1            | 2/1                             |                                 |               |               |               |  |
| PTPRC        | Receptor-type tyrosine-protein phosphatase C                      | X                     | X               | X            | X                              | X                            |                                            |                       |             |             |              |                    | X                                   | X                        | X                            | X                                | X                                        |                                  | 0/3            | 0/3                             |                                 |               |               |               |  |
| 4F2          | 4F2 cell-surface antigen heavy chain                              | X                     | X               | X            | X                              |                              |                                            |                       |             | X           |              |                    |                                     |                          |                              |                                  |                                          |                                  | 0/3            | 0/3                             |                                 |               |               |               |  |
| BIP          | Endoplasmic reticulum chaperone BIP                               | X                     | X               | X            |                                |                              |                                            | X                     |             |             |              |                    |                                     | X                        | X                            |                                  |                                          |                                  | 0/3            | 0/4                             |                                 |               |               |               |  |
| CATB         | Cathepsin B                                                       | X                     | X               | X            |                                |                              |                                            |                       | X           | X           |              |                    |                                     | X                        |                              |                                  |                                          |                                  | 1/2            | 0/3                             |                                 |               |               |               |  |
| HRG          | Histidine-rich glycoprotein                                       | X                     | X               | X            |                                |                              |                                            |                       | X           | X           |              |                    | X                                   | X                        | X                            |                                  |                                          |                                  | 3/4            | 2/4                             |                                 |               |               |               |  |
| TRFL         | Lactotransferrin                                                  | X                     | X               | X            |                                |                              |                                            |                       | X           |             |              |                    | X                                   | X                        |                              |                                  |                                          |                                  | 4/3            | 5/3                             |                                 |               |               |               |  |
| TLN1         | Talin-1                                                           | X                     | X               | X            |                                |                              |                                            |                       |             |             | X            |                    |                                     |                          |                              |                                  |                                          |                                  | 0/3            | 0/4                             |                                 |               |               |               |  |
| EPCR         | Endothelial protein C receptor                                    | X                     | X               | X            |                                |                              |                                            |                       |             |             | X            |                    |                                     |                          |                              |                                  |                                          |                                  | 3/0            | 3/0                             |                                 |               |               |               |  |
| ATPB         | ATP synthase subunit beta, mitochondrial                          | X                     | X               | X            |                                |                              |                                            |                       |             |             |              |                    |                                     |                          | X                            |                                  |                                          |                                  | 0/3            | 0/3                             |                                 |               |               |               |  |
| ICAM1        | Intercellular adhesion molecule 1                                 | X                     | X               | X            |                                |                              |                                            |                       |             |             |              |                    | X                                   | X                        | X                            |                                  |                                          |                                  | 0/1            | 0/3                             |                                 |               |               |               |  |
| IDE          | Insulin-degrading enzyme                                          | X                     | X               | X            |                                |                              |                                            |                       |             |             |              |                    |                                     |                          |                              |                                  |                                          |                                  | 0/4            | 0/4                             |                                 |               |               |               |  |
| ITA4         | Integrin alpha-4                                                  | X                     | X               | X            |                                |                              |                                            |                       |             |             |              |                    | X                                   | X                        | X                            | X                                |                                          |                                  | 0/2            | 0/2                             |                                 |               |               |               |  |
| LEUK         | Leukosialin                                                       | X                     | X               | X            |                                |                              |                                            |                       |             |             |              |                    | X                                   |                          |                              | X                                |                                          |                                  | 3/4            | 5/4                             |                                 |               |               |               |  |
| MASP2        | Mannan-binding lectin serine protease 2                           | X                     | X               | X            |                                |                              |                                            |                       |             |             |              |                    | X                                   |                          |                              |                                  | X                                        |                                  | 2/2            | 5/3                             |                                 |               |               |               |  |
| ZA2G         | Zinc-alpha-2-glycoprotein                                         | X                     | X               | X            |                                |                              |                                            |                       |             |             |              |                    |                                     |                          |                              |                                  |                                          |                                  | 5/4            | 5/4                             |                                 |               |               |               |  |
| PACN2        | Protein kinase C and casein kinase substrate in neurons protein 2 | X                     | X               |              | X                              | X                            |                                            |                       | X           |             | X            |                    |                                     |                          |                              |                                  | X                                        |                                  | 2/0            | 0/0                             |                                 |               |               |               |  |
| COR1A        | Coronin-1A                                                        | X                     | X               |              | X                              | X                            |                                            |                       | X           |             | X            |                    | X                                   | X                        | X                            | X                                | X                                        | X                                | 0/1            | 0/4                             |                                 |               |               |               |  |
| FABP5        | Fatty acid-binding protein 5                                      | X                     | X               |              | X                              | X                            |                                            |                       |             | X           |              |                    |                                     |                          |                              |                                  |                                          |                                  | 5/4            | 5/4                             |                                 |               |               |               |  |
| LYN          | Tyrosine-protein kinase Lyn                                       | X                     | X               |              | X                              | X                            |                                            |                       |             | X           |              |                    | X                                   | X                        | X                            | X                                | X                                        |                                  | 0/1            | 0/2                             |                                 |               |               |               |  |
| DESP         | Desmoplakin                                                       | X                     | X               |              | X                              | X                            |                                            |                       |             |             | X            |                    |                                     |                          |                              |                                  |                                          |                                  | 5/4            | 5/4                             |                                 |               |               |               |  |
| GTR3         | Solute carrier family 2, facilitated glucose transporter member 3 | X                     | X               |              | X                              | X                            |                                            |                       |             |             |              |                    |                                     |                          |                              |                                  |                                          |                                  | 0/2            | 0/2                             |                                 |               |               |               |  |
| PECA1        | Platelet endothelial cell adhesion molecule                       | X                     | X               |              | X                              | X                            |                                            |                       |             |             |              |                    |                                     |                          | X                            |                                  |                                          |                                  | 0/3            | 2/3                             |                                 |               |               |               |  |
| CATA         | Catalase                                                          | X                     | X               |              | X                              |                              |                                            | X                     |             | X           |              |                    |                                     | X                        |                              |                                  |                                          |                                  | 5/4            | 5/4                             |                                 |               |               |               |  |
| SYNE2        | Nesprin-2                                                         | X                     | X               |              | X                              |                              |                                            | X                     |             |             | X            |                    |                                     |                          | X                            |                                  |                                          |                                  | 2/0            | 2/0                             |                                 |               |               |               |  |
| PROS         | Vitamin K-dependent protein 5                                     | X                     | X               |              | X                              |                              |                                            | X                     |             |             |              |                    |                                     |                          |                              |                                  |                                          |                                  | 4/4            | 5/4                             |                                 |               |               |               |  |
| GBB2         | Guanine nucleotide-binding protein G(I)/G(S)/G(T) subunit beta-2  | X                     | X               |              | X                              |                              |                                            |                       | X           |             |              |                    |                                     |                          |                              |                                  |                                          |                                  | 0/0            | 0/4                             |                                 |               |               |               |  |
| GTR1         | Solute carrier family 2, facilitated glucose transporter member 1 | X                     | X               |              | X                              |                              |                                            |                       |             |             | X            |                    |                                     |                          |                              |                                  |                                          |                                  | 0/4            | 0/4                             |                                 |               |               |               |  |
| PLEC         | Plectin                                                           | X                     | X               |              | X                              |                              |                                            |                       |             |             | X            |                    |                                     |                          |                              |                                  |                                          |                                  | 0/4            | 0/4                             |                                 |               |               |               |  |
| CTL1         | Choline transporter-like protein 1                                | X                     | X               |              | X                              |                              |                                            |                       |             |             |              |                    |                                     |                          |                              |                                  |                                          |                                  | 0/2            | 0/1                             |                                 |               |               |               |  |
| CIB1         | Calcium and integrin-binding protein 1                            | X                     | X               |              |                                |                              |                                            | X                     |             | X           |              |                    | X                                   | X                        | X                            |                                  | X                                        |                                  | 0/1            | 0/3                             |                                 |               |               |               |  |
| RHOC         | Rho-related GTP-binding protein RhoC                              | X                     | X               |              |                                |                              |                                            | X                     |             |             | X            |                    |                                     |                          | X                            |                                  |                                          |                                  | 0/1            | 0/2                             |                                 |               |               |               |  |
| CO6A2        | Collagen alpha-2(VI) chain                                        | X                     | X               |              |                                |                              |                                            | X                     |             |             |              |                    |                                     |                          |                              |                                  | X                                        |                                  | 5/4            | 5/4                             |                                 |               |               |               |  |
| CO6A3        | Collagen alpha-3(VI) chain                                        | X                     | X               |              |                                |                              |                                            | X                     |             |             |              |                    |                                     |                          |                              |                                  |                                          |                                  | 5/4            | 5/4                             |                                 |               |               |               |  |
| VTNC         | Vitronectin                                                       | X                     | X               |              |                                |                              |                                            | X                     |             |             |              |                    |                                     |                          | X                            |                                  | X                                        |                                  | 4/4            | 5/4                             |                                 |               |               |               |  |
| CAP1         | Adenylyl cyclase-associated protein 1                             | X                     | X               |              |                                |                              |                                            |                       |             | X           | X            |                    |                                     |                          |                              |                                  |                                          |                                  | 0/1            | 0/2                             |                                 |               |               |               |  |
| CAN1         | Calpain-1 catalytic subunit                                       | X                     | X               |              |                                |                              |                                            |                       |             |             | X            |                    |                                     |                          |                              |                                  |                                          |                                  | 0/4            | 0/4                             |                                 |               |               |               |  |
| PCYOX        | Prenylcysteine oxidase 1                                          | X                     | X               |              |                                |                              |                                            |                       |             | X           |              |                    |                                     |                          |                              |                                  |                                          |                                  | 0/2            | 0/2                             |                                 |               |               |               |  |
| COF1         | Cofilin-1                                                         | X                     | X               |              |                                |                              |                                            |                       |             |             | X            |                    |                                     | X                        |                              |                                  | X                                        |                                  | 2/2            | 3/4                             |                                 |               |               |               |  |
| PLSL         | Plastin-2                                                         | X                     | X               |              |                                |                              |                                            |                       |             |             | X            |                    |                                     |                          |                              |                                  |                                          |                                  | 0/3            | 0/3                             |                                 |               |               |               |  |
| PLAK         | Junction plakoglobin                                              | X                     | X               |              |                                |                              |                                            |                       |             |             | X            |                    |                                     |                          | X                            |                                  |                                          |                                  | 5/4            | 5/4                             |                                 |               |               |               |  |
| PEPL         | Periplakin                                                        | X                     | X               |              |                                |                              |                                            |                       |             |             | X            |                    |                                     |                          |                              |                                  |                                          |                                  | 0/0            | 0/3                             |                                 |               |               |               |  |
| FSCN1        | Fascin                                                            | X                     | X               |              |                                |                              |                                            |                       |             | X           |              |                    |                                     |                          |                              |                                  |                                          |                                  | 0/2            | 0/1                             |                                 |               |               |               |  |
| TITIN        | Titin                                                             | X                     | X               |              |                                |                              |                                            |                       |             |             | X            |                    |                                     |                          |                              |                                  |                                          |                                  | 5/0            | 5/0                             |                                 |               |               |               |  |
| WDR1         | WD repeat-containing protein 1                                    | X                     | X               |              |                                |                              |                                            |                       |             |             | X            |                    |                                     |                          |                              |                                  | X                                        |                                  | 0/1            | 0/3                             |                                 |               |               |               |  |
| B3AT         | Band 3 anion transport protein                                    | X                     | X               |              |                                |                              |                                            |                       |             |             | X            |                    |                                     |                          |                              |                                  |                                          |                                  | 4/4            | 3/4                             |                                 |               |               |               |  |
| PODXL        | Podocalyxin                                                       | X                     | X               |              |                                |                              |                                            |                       |             |             | X            |                    |                                     |                          | X                            | X                                |                                          |                                  | 3/3            | 5/4                             |                                 |               |               |               |  |
| S10A8        | Protein S100-A8                                                   | X                     | X               |              |                                |                              |                                            |                       |             |             | X            |                    |                                     | X                        |                              |                                  |                                          |                                  | 5/4            | 5/4                             |                                 |               |               |               |  |
| S10A9        | Protein S100-A9                                                   | X                     | X               |              |                                |                              |                                            |                       |             |             | X            |                    |                                     | X                        |                              |                                  |                                          |                                  | 5/4            | 5/4                             |                                 |               |               |               |  |
| CYTM         | Cystatin-M                                                        | X                     | X               |              |                                |                              |                                            |                       |             |             |              |                    |                                     |                          |                              |                                  |                                          |                                  | 0/2            | 0/3                             |                                 |               |               |               |  |
| TGM1         | Protein-glutamine gamma-glutamyltransferase K                     | X                     | X               |              |                                |                              |                                            |                       |             |             |              |                    |                                     |                          |                              |                                  |                                          |                                  | 5/4            | 5/4                             |                                 |               |               |               |  |
| AQP1         | Aquaporin-1                                                       | X                     | X               |              |                                |                              |                                            |                       |             |             |              |                    | X                                   | X                        |                              |                                  |                                          |                                  | 0/2            | 0/2                             |                                 |               |               |               |  |
| AT1B3        | Sodium/potassium-transporting ATPase subunit beta-3               | X                     | X               |              |                                |                              |                                            |                       |             |             |              |                    |                                     |                          |                              |                                  |                                          |                                  | 0/2            | 0/4                             |                                 |               |               |               |  |
| GGT1         | Glutathione hydrolase 1 proenzyme                                 | X                     | X               |              |                                |                              |                                            |                       |             |             |              |                    | X                                   |                          |                              |                                  |                                          |                                  | 2/0            | 3/0                             |                                 |               |               |               |  |
| GNA13        | Guanine nucleotide-binding protein subunit alpha-13               | X                     | X               |              |                                |                              |                                            |                       |             |             |              |                    |                                     |                          | X                            |                                  | X                                        |                                  | 0/1            | 0/3                             |                                 |               |               |               |  |
| IL1RA        | Interleukin-1 receptor antagonist protein                         | X                     | X               |              |                                |                              |                                            |                       |             |             |              |                    |                                     |                          |                              | X                                |                                          |                                  | 0/2            | 0/0                             |                                 |               |               |               |  |
| ITIH4        | Inter-alpha-trypsin inhibitor heavy chain H4                      | X                     | X               |              |                                |                              |                                            |                       |             |             |              |                    |                                     |                          |                              |                                  |                                          |                                  | 2/3            | 3/4                             |                                 |               |               |               |  |
| JAM1         | Junctional adhesion molecule A                                    | X                     | X               |              |                                |                              |                                            |                       |             |             |              |                    |                                     |                          |                              | X                                | X                                        |                                  | 0/2            | 0/3                             |                                 |               |               |               |  |
| MUC5B        | Mucin-5B                                                          | X                     | X               |              |                                |                              |                                            |                       |             |             |              |                    |                                     |                          |                              |                                  |                                          |                                  | 0/2            | 0/2                             |                                 |               |               |               |  |
| S100P        | Protein S100-P                                                    | X                     | X               |              |                                |                              |                                            |                       |             |             |              |                    |                                     |                          |                              |                                  |                                          |                                  | 0/2            | 0/2                             |                                 |               |               |               |  |
| A2AP         | Alpha-2-antiplasmin                                               | X                     |                 | X            |                                |                              |                                            |                       |             |             |              |                    |                                     |                          |                              | X                                |                                          |                                  | 0/2            | 0/0                             |                                 |               |               |               |  |
| TERA         | Transitional endoplasmic reticulum ATPase                         | X                     |                 |              |                                |                              |                                            | X                     |             | X           |              | X                  |                                     | X                        |                              |                                  |                                          |                                  | 0/2            | 0/2                             |                                 |               |               |               |  |
| PPGB         | Lysosomal protective protein                                      | X                     |                 |              |                                |                              |                                            | X                     |             | X           |              |                    |                                     |                          |                              |                                  |                                          |                                  | 0/3            | 0/2                             |                                 |               |               |               |  |
| FETUA        | Alpha-2-HS-glycoprotein                                           | X                     |                 |              |                                |                              |                                            | X                     |             |             |              |                    |                                     |                          |                              |                                  | X                                        |                                  | 0/1            | 0/3                             |                                 |               |               |               |  |
| HEP2         | Heparin cofactor 2                                                | X                     |                 |              |                                |                              |                                            | X                     |             |             |              |                    |                                     |                          |                              |                                  |                                          |                                  | 0/2            | 0/1                             |                                 |               |               |               |  |
| ITIH2        | Inter-alpha-trypsin inhibitor heavy chain H2                      | X                     |                 |              |                                |                              |                                            | X                     |             |             |              |                    |                                     |                          |                              |                                  |                                          |                                  | 3/4            | 5/4                             |                                 |               |               |               |  |
| KPYM         | Pyruvate kinase PKM                                               | X                     |                 |              |                                |                              |                                            | X                     |             |             |              |                    |                                     |                          |                              |                                  |                                          |                                  | 4/4            | 4/4                             |                                 |               |               |               |  |
| NUCB1        | Nucleobindin-1                                                    | X                     |                 |              |                                |                              |                                            | X                     |             |             |              |                    |                                     |                          |                              |                                  |                                          |                                  | 0/2            | 0/1                             |                                 |               |               |               |  |
| TKT          | Transketolase                                                     | X                     |                 |              |                                |                              |                                            | X                     |             |             |              |                    |                                     |                          |                              |                                  |                                          |                                  | 0/2            | 0/4                             |                                 |               |               |               |  |

| Abbreviation | Protein Name                                     | Cellular Component    |                 |              |                                |                              |                                            |                       |          |          |              |                    |                                     |                          | Biological Process           |                                  |                                          |                                  |                |          |          | 35 nm<br>n=9<br>data point<br>(A) /<br>data point<br>(B)<br>5/4 | 70 nm<br>n=9<br>data point<br>(A) /<br>data point<br>(B)<br>5/4 | measurement |  |  |
|--------------|--------------------------------------------------|-----------------------|-----------------|--------------|--------------------------------|------------------------------|--------------------------------------------|-----------------------|----------|----------|--------------|--------------------|-------------------------------------|--------------------------|------------------------------|----------------------------------|------------------------------------------|----------------------------------|----------------|----------|----------|-----------------------------------------------------------------|-----------------------------------------------------------------|-------------|--|--|
|              |                                                  | Extracellular exosome | Plasma membrane | Cell surface | Bounding membrane of organelle | Cytoplasmic vesicle membrane | COPII-coated ER to Golgi transport vesicle | Endoplasmic reticulum | Endosome | Lysosome | Cytoskeleton | Proteasome complex | Regulation of immune system process | Regulation of cell death | Regulation of cell migration | Regulation of cell-cell adhesion | Regulation of vesicle-mediated transport | Regulation of cell morphogenesis | (A) + (B)<br>% | (A)<br>% | (B)<br>% |                                                                 |                                                                 |             |  |  |
|              |                                                  |                       |                 |              |                                |                              |                                            |                       |          |          |              |                    |                                     |                          |                              |                                  |                                          |                                  |                |          |          |                                                                 |                                                                 |             |  |  |
|              |                                                  |                       |                 |              |                                |                              |                                            |                       |          |          |              |                    |                                     |                          |                              |                                  |                                          |                                  |                |          |          |                                                                 |                                                                 |             |  |  |
|              |                                                  |                       |                 |              |                                |                              |                                            |                       |          |          |              |                    |                                     |                          |                              |                                  |                                          |                                  |                |          |          |                                                                 |                                                                 |             |  |  |
| TPP1         | Tripeptidyl-peptidase 1                          | X                     |                 |              |                                |                              |                                            |                       | X        | X        |              |                    |                                     |                          |                              |                                  |                                          |                                  | 0/2            | 0/1      |          |                                                                 |                                                                 |             |  |  |
| ILEU         | Leukocyte elastase inhibitor                     | X                     |                 |              |                                |                              |                                            |                       | X        | X        |              |                    |                                     |                          |                              |                                  |                                          |                                  | 0/2            | 0/2      |          |                                                                 |                                                                 |             |  |  |
| A1AG2        | Alpha-1-acid glycoprotein 2                      | X                     |                 |              |                                |                              |                                            |                       |          | X        |              | X                  |                                     |                          |                              |                                  |                                          |                                  | 4/4            | 3/4      |          |                                                                 |                                                                 |             |  |  |
| BGLR         | Beta-glucuronidase                               | X                     |                 |              |                                |                              |                                            |                       |          | X        |              |                    |                                     |                          |                              |                                  |                                          |                                  | 4/0            | 5/0      |          |                                                                 |                                                                 |             |  |  |
| DEF3         | Neutrophil defensin 3                            | X                     |                 |              |                                |                              |                                            |                       |          | X        |              |                    |                                     |                          |                              |                                  |                                          |                                  | 3/3            | 4/4      |          |                                                                 |                                                                 |             |  |  |
| GGH          | Gamma-glutamyl hydrolase                         | X                     |                 |              |                                |                              |                                            |                       |          | X        |              |                    |                                     |                          |                              |                                  |                                          |                                  | 0/4            | 0/4      |          |                                                                 |                                                                 |             |  |  |
| RETN         | Resistin                                         | X                     |                 |              |                                |                              |                                            |                       |          | X        |              |                    |                                     |                          |                              |                                  |                                          |                                  | 0/2            | 0/3      |          |                                                                 |                                                                 |             |  |  |
| TOLIP        | Toll-interacting protein                         | X                     |                 |              |                                |                              |                                            |                       |          | X        |              |                    |                                     |                          |                              |                                  |                                          |                                  | 0/4            | 0/2      |          |                                                                 |                                                                 |             |  |  |
| PSA1         | Proteasome subunit alpha type-1                  | X                     |                 |              |                                |                              |                                            |                       |          |          | X            | X                  | X                                   |                          |                              |                                  |                                          |                                  | 0/3            | 0/4      |          |                                                                 |                                                                 |             |  |  |
| ARPC4        | Actin-related protein 2/3 complex subunit 4      | X                     |                 |              |                                |                              |                                            |                       |          |          | X            |                    |                                     |                          |                              |                                  |                                          |                                  | 0/2            | 0/3      |          |                                                                 |                                                                 |             |  |  |
| MYL6         | Myosin light polypeptide 6                       | X                     |                 |              |                                |                              |                                            |                       |          |          | X            |                    |                                     |                          |                              |                                  |                                          |                                  | 0/0            | 0/2      |          |                                                                 |                                                                 |             |  |  |
| CAN7         | Calpain-7                                        | X                     |                 |              |                                |                              |                                            |                       |          |          | X            |                    |                                     |                          | X                            |                                  |                                          |                                  | 0/0            | 4/0      |          |                                                                 |                                                                 |             |  |  |
| GDIR2        | Rho GDP-dissociation inhibitor 2                 | X                     |                 |              |                                |                              |                                            |                       |          |          | X            |                    |                                     |                          | X                            |                                  |                                          |                                  | 0/1            | 0/3      |          |                                                                 |                                                                 |             |  |  |
| IF6          | Eukaryotic translation initiation factor 6       | X                     |                 |              |                                |                              |                                            |                       |          |          | X            |                    | X                                   |                          |                              |                                  |                                          |                                  | 1/3            | 1/3      |          |                                                                 |                                                                 |             |  |  |
| K2C6B        | Keratin, type II cytoskeletal 6B                 | X                     |                 |              |                                |                              |                                            |                       |          |          | X            |                    |                                     |                          |                              |                                  |                                          |                                  | 0/4            | 0/4      |          |                                                                 |                                                                 |             |  |  |
| PROF1        | Profilin-1                                       | X                     |                 |              |                                |                              |                                            |                       |          |          | X            |                    |                                     |                          | X                            |                                  |                                          |                                  | 0/3            | 0/4      |          |                                                                 |                                                                 |             |  |  |
| PSA2         | Proteasome subunit alpha type-2                  | X                     |                 |              |                                |                              |                                            |                       |          |          |              | X                  |                                     |                          |                              |                                  |                                          |                                  | 0/4            | 0/3      |          |                                                                 |                                                                 |             |  |  |
| PSA3         | Proteasome subunit alpha type-3                  | X                     |                 |              |                                |                              |                                            |                       |          |          |              |                    | X                                   |                          |                              |                                  |                                          |                                  | 0/4            | 0/3      |          |                                                                 |                                                                 |             |  |  |
| PSA4         | Proteasome subunit alpha type-4                  | X                     |                 |              |                                |                              |                                            |                       |          |          |              | X                  |                                     |                          |                              |                                  |                                          |                                  | 0/1            | 0/3      |          |                                                                 |                                                                 |             |  |  |
| PSA6         | Proteasome subunit alpha type-6                  | X                     |                 |              |                                |                              |                                            |                       |          |          |              | X                  |                                     |                          |                              |                                  |                                          |                                  | 0/2            | 0/3      |          |                                                                 |                                                                 |             |  |  |
| PSA7         | Proteasome subunit alpha type-7                  | X                     |                 |              |                                |                              |                                            |                       |          |          |              | X                  |                                     |                          |                              |                                  |                                          |                                  | 0/3            | 0/3      |          |                                                                 |                                                                 |             |  |  |
| PSB1         | Proteasome subunit beta type-1                   | X                     |                 |              |                                |                              |                                            |                       |          |          |              | X                  |                                     |                          |                              |                                  |                                          |                                  | 0/2            | 0/3      |          |                                                                 |                                                                 |             |  |  |
| PSB2         | Proteasome subunit beta type-2                   | X                     |                 |              |                                |                              |                                            |                       |          |          |              | X                  |                                     |                          |                              |                                  |                                          |                                  | 0/2            | 0/0      |          |                                                                 |                                                                 |             |  |  |
| PSB3         | Proteasome subunit beta type-3                   | X                     |                 |              |                                |                              |                                            |                       |          |          |              | X                  |                                     |                          |                              |                                  |                                          |                                  | 0/2            | 0/1      |          |                                                                 |                                                                 |             |  |  |
| S10AE        | Protein S100-A14                                 | X                     |                 |              |                                |                              |                                            |                       |          |          |              |                    | X                                   |                          | X                            |                                  |                                          |                                  | 4/4            | 3/3      |          |                                                                 |                                                                 |             |  |  |
| LEG7         | Galectin-7                                       | X                     |                 |              |                                |                              |                                            |                       |          |          |              |                    | X                                   |                          |                              | X                                |                                          |                                  | 3/4            | 4/4      |          |                                                                 |                                                                 |             |  |  |
| PNPH         | Purine nucleoside phosphorylase                  | X                     |                 |              |                                |                              |                                            |                       |          |          |              |                    | X                                   |                          |                              | X                                |                                          |                                  | 0/3            | 0/2      |          |                                                                 |                                                                 |             |  |  |
| BPIB1        | BPI fold-containing family B member 1            | X                     |                 |              |                                |                              |                                            |                       |          |          |              |                    | X                                   |                          |                              |                                  |                                          |                                  | 0/1            | 0/2      |          |                                                                 |                                                                 |             |  |  |
| H4           | Histone H4                                       | X                     |                 |              |                                |                              |                                            |                       |          |          |              |                    | X                                   |                          |                              |                                  |                                          |                                  | 5/4            | 5/4      |          |                                                                 |                                                                 |             |  |  |
| 1433Z        | 14-3-3 protein zeta/delta                        | X                     |                 |              |                                |                              |                                            |                       |          |          |              |                    |                                     | X                        |                              |                                  |                                          |                                  | 5/4            | 4/4      |          |                                                                 |                                                                 |             |  |  |
| NDKB         | Nucleoside diphosphate kinase B                  | X                     |                 |              |                                |                              |                                            |                       |          |          |              |                    |                                     | X                        |                              |                                  |                                          |                                  | 0/1            | 0/2      |          |                                                                 |                                                                 |             |  |  |
| THIO         | Thioredoxin                                      | X                     |                 |              |                                |                              |                                            |                       |          |          |              |                    |                                     | X                        |                              |                                  |                                          |                                  | 5/4            | 5/4      |          |                                                                 |                                                                 |             |  |  |
| S10AB        | Protein S100-A11                                 | X                     |                 |              |                                |                              |                                            |                       |          |          |              |                    |                                     |                          | X                            |                                  |                                          |                                  | 0/1            | 0/4      |          |                                                                 |                                                                 |             |  |  |
| A1BG         | Alpha-1B-glycoprotein                            | X                     |                 |              |                                |                              |                                            |                       |          |          |              |                    |                                     |                          |                              |                                  |                                          |                                  | 0/2            | 0/4      |          |                                                                 |                                                                 |             |  |  |
| AL9A1        | 4-trimethylaminobutyraldehyde dehydrogenase      | X                     |                 |              |                                |                              |                                            |                       |          |          |              |                    |                                     |                          |                              |                                  |                                          |                                  | 0/1            | 0/2      |          |                                                                 |                                                                 |             |  |  |
| BLMH         | Bleomycin hydrolase                              | X                     |                 |              |                                |                              |                                            |                       |          |          |              |                    |                                     |                          |                              |                                  |                                          |                                  | 3/4            | 2/4      |          |                                                                 |                                                                 |             |  |  |
| CALL3        | Calmodulin-like protein 3                        | X                     |                 |              |                                |                              |                                            |                       |          |          |              |                    |                                     |                          |                              |                                  |                                          |                                  | 0/0            | 0/2      |          |                                                                 |                                                                 |             |  |  |
| CAMP         | Cathelicidin antimicrobial peptide               | X                     |                 |              |                                |                              |                                            |                       |          |          |              |                    |                                     |                          |                              |                                  |                                          |                                  | 5/0            | 1/0      |          |                                                                 |                                                                 |             |  |  |
| CYTB         | Cystatin-B                                       | X                     |                 |              |                                |                              |                                            |                       |          |          |              |                    |                                     |                          |                              |                                  |                                          |                                  | 0/4            | 0/4      |          |                                                                 |                                                                 |             |  |  |
| DCD          | Dermcidin                                        | X                     |                 |              |                                |                              |                                            |                       |          |          |              |                    |                                     |                          |                              |                                  |                                          |                                  | 5/4            | 5/4      |          |                                                                 |                                                                 |             |  |  |
| FBX50        | F-box only protein 50                            | X                     |                 |              |                                |                              |                                            |                       |          |          |              |                    |                                     |                          |                              |                                  |                                          |                                  | 4/4            | 4/4      |          |                                                                 |                                                                 |             |  |  |
| GSHB         | Glutathione synthetase                           | X                     |                 |              |                                |                              |                                            |                       |          |          |              |                    |                                     |                          |                              |                                  |                                          |                                  | 0/2            | 0/3      |          |                                                                 |                                                                 |             |  |  |
| H33          | Histone H3.3                                     | X                     |                 |              |                                |                              |                                            |                       |          |          |              |                    |                                     |                          |                              |                                  |                                          |                                  | 3/3            | 2/3      |          |                                                                 |                                                                 |             |  |  |
| IDHC         | Isocitrate dehydrogenase [NADP] cytoplasmic      | X                     |                 |              |                                |                              |                                            |                       |          |          |              |                    |                                     |                          |                              |                                  |                                          |                                  | 0/3            | 0/4      |          |                                                                 |                                                                 |             |  |  |
| ITIH1        | Inter-alpha-trypsin inhibitor heavy chain H1     | X                     |                 |              |                                |                              |                                            |                       |          |          |              |                    |                                     |                          |                              |                                  |                                          |                                  | 3/1            | 5/3      |          |                                                                 |                                                                 |             |  |  |
| KPRP         | Keratinocyte proline-rich protein                | X                     |                 |              |                                |                              |                                            |                       |          |          |              |                    |                                     |                          |                              |                                  |                                          |                                  | 5/4            | 5/4      |          |                                                                 |                                                                 |             |  |  |
| MDHM         | Malate dehydrogenase, mitochondrial              | X                     |                 |              |                                |                              |                                            |                       |          |          |              |                    |                                     |                          |                              |                                  |                                          |                                  | 0/0            | 0/4      |          |                                                                 |                                                                 |             |  |  |
| SMR3B        | Submaxillary gland androgen-regulated protein 3B | X                     |                 |              |                                |                              |                                            |                       |          |          |              |                    |                                     |                          |                              |                                  |                                          |                                  | 3/0            | 5/0      |          |                                                                 |                                                                 |             |  |  |
| TPIS         | Triosephosphate isomerase                        | X                     |                 |              |                                |                              |                                            |                       |          |          |              |                    |                                     |                          |                              |                                  |                                          |                                  | 0/4            | 0/4      |          |                                                                 |                                                                 |             |  |  |
| ZG16B        | Zymogen granule protein 16 homolog B             | X                     |                 |              |                                |                              |                                            |                       |          |          |              |                    |                                     |                          |                              |                                  |                                          |                                  | 1/0            | 2/0      |          |                                                                 |                                                                 |             |  |  |
