# Supplementary material for: Effect of the 35 nm and 70 nm Size Exclusion Chromatography (SEC) Column and Plasma Storage Time on Separated Extracellular Vesicles
Source: Curr Issues Mol Biol. 2024 May 6;46(5):4337–57. doi: 10.3390/cimb46050264 (PMC11120626; doi:10.3390/cimb46050264)
Supplement: Supplementary file 1 [file cimb-46-00264-s001.zip]

Archive with 6 entries (6 files):
- cimb-2955937-supplementary-Figures.pdf
- cimb-2955937-supplementary-Table1.pdf
- cimb-2955937-supplementary-Table5.pdf
- cimb-2955937-supplementary-Table6.pdf
- cimb-2955937-supplementary-Table7.pdf
- cimb-2955937-supplementary-Tables 2-4.pdf
